# Supplementary material for: The pH-Responsive PacC Transcription Factor of Aspergillus fumigatus Governs Epithelial Entry and Tissue Invasion during Pulmonary Aspergillosis
Source: PLoS Pathog. 2014 Oct 16;10(10):e1004413. doi: 10.1371/journal.ppat.1004413 (PMC4199764; doi:10.1371/journal.ppat.1004413)
Supplement: Dataset S3 — Expression of genes encoding secreted gene products which are regulated by either PrtT or PacC, or both transcription factors. (XLSX) [file ppat.1004413.s003.xlsx]

## Sheet: PacC down-regulated only
ORF	4 HOURS	8 HOURS	12 HOURS	16 HOURS	ANNOTATION
AFUA_1G01540	-1.67055	-1.22504	0.780549	-0.931767	Endonuclease/Exonuclease/phosphatase family family
AFUA_1G04130	-1.63459	-0.670284	-1.31397	-0.752591	FG-GAP repeat protein, putative
AFUA_1G06200	-1.66955	-1.95899	-1.15348	-1.37048	Mn2+ homeostasis protein (Per1), putative
AFUA_1G09360	-1.60508	-0.328451	-0.48145	-0.887049	DUF1242 domain protein, putative
AFUA_1G09650	-0.403419	-0.94652	-2.03731	-0.454445	GPI anchored protein, putative
AFUA_1G10790	-0.469221	-0.251372	-1.61445	-0.835706	alpha-1,2-mannosidase family protein, putative
AFUA_1G13760	-0.04356	-0.301427	-1.61077	-0.877723	cell wall anchored protein, putative
AFUA_1G16250	-4.035	-1.84409	-2.13436	-1.88293	alpha-glucosidase B
AFUA_1G17050	-1.09478	-0.128926	-1.93201	-0.186461	hypothetical protein
AFUA_1G17590	-1.69855	-1.67772	-0.794222	-0.332454	phosphoesterase superfamily protein
AFUA_2G00760	-0.568078	-1.74773	-1.45866	-2.36466	pectate lyase A
AFUA_2G00770	-1.36273	-0.927652	-1.84982	-0.745806	salicylate hydroxylase
AFUA_2G00810	0.648043	0.509213	-2.10662	-0.668598	purine nucleoside permease, putative
AFUA_2G04570	-2.44831	-0.930067	-1.68593	-1.30891	BNR/Asp-box repeat domain protein
AFUA_2G09030	-2.75826	-2.48013	-2.99924	-3.10003	secreted dipeptidyl peptidase
AFUA_2G12680	-1.60738	-3.33028	-3.10868	-4.32004	conserved hypothetical protein
AFUA_2G14490	-2.21697	-4.42803	-1.82007	-4.76492	endoglucanase, putative
AFUA_2G14540	-1.87784	-1.5396	-1.04582	-1.80602	endoglucanase, putative
AFUA_2G14630	-1.25402	-0.551277	0.32016	-1.56119	cell wall glycosyl hydrolase family 88 (YteR), putative
AFUA_2G15950	-1.04929	-3.2033	-1.86001	-2.89047	aspartic endopeptidase, putative
AFUA_3G01480	-1.66326	-1.55071	-1.40997	-2.65216	conserved hypothetical protein
AFUA_3G01530	-3.20859	-1.88933	-2.17903	-1.07232	phosphatidylglycerol specific phospholipase, putative
AFUA_3G02090	0.0469666	-0.463456	-1.93925	1.57127	beta-xylosidase
AFUA_3G02260	-1.71869	-0.90271	-1.10001	-1.42928	hypothetical protein
AFUA_3G02270	-0.912981	-0.92208	-1.64397	-2.00883	mycelial catalase Cat1
AFUA_3G03040	-0.10769	1.28766	-1.74057	2.21777	conserved hypothetical protein
AFUA_3G07900	-2.38643	-1.74359	0.105281	-2.55378	conserved hypothetical protein
AFUA_3G08680	-0.502502	-0.24048	-1.7102	-0.421952	extracellular exo-polygalacturonase, putative
AFUA_3G08870	-1.39231	-0.790644	-1.73617	-0.575219	conserved hypothetical protein
AFUA_3G14620	-0.577497	0.0670047	-2.14301	-0.678128	extracellular endo-1,5-alpha-L-arabinase, putative
AFUA_4G00500	-1.00956	-0.207432	-2.83641	0.533815	hypothetical protein
AFUA_4G00750	-2.72763	-2.77103	-1.91663	-3.41439	hypothetical protein
AFUA_4G01030	-1.23607	0.0266438	-1.59185	-0.199086	conserved hypothetical protein
AFUA_4G06640	-2.27796	-1.27069	-2.21682	-0.615231	acid sphingomyelinase
AFUA_4G08840	-2.30833	-2.94894	-3.14807	-2.17858	RING finger domain protein, putative
AFUA_4G08850	-1.94481	-1.8697	-2.12361	-1.91918	hypothetical protein
AFUA_4G09320	-5.72497	-3.66217	-5.7436	-6.05152	antigenic dipeptidyl-peptidase Dpp4
AFUA_4G09450	-1.7576	-0.174613	-0.677192	-0.233259	hypothetical protein
AFUA_4G09560	-2.96726	-2.22657	-0.214322	-2.93109	ZIP Zinc transporter, putative
AFUA_4G14070	-0.752866	-2.59321	0.220143	-2.38295	glycosyl transferase, putative
AFUA_4G14180	-1.68966	-1.29987	0.537285	-1.83195	hypothetical protein
AFUA_4G14420	-2.18123	-1.66204	-0.134264	-1.03666	secreted glycosyl hydrolase, putative
AFUA_5G00540	-0.79988	-1.88016	-0.114873	-2.55945	extracellular signaling protein FacC, putative
AFUA_5G00770	-0.615762	-2.24941	-2.13714	-2.68449	integral membrane protein, putative
AFUA_5G01710	-2.27196	1.12971	-1.27487	-1.78686	cytochrome P450 phenylacetate 2-hydroxylase, putative
AFUA_5G01990	-1.77913	-1.7868	-1.19845	-0.722518	BYS1 domain protein, putative
AFUA_5G02390	0.238379	0.524236	-1.85198	0.30538	Auxin Efflux Carrier superfamily
AFUA_5G04040	-2.2858	-0.241675	-0.885425	-0.837898	conserved hypothetical protein
AFUA_5G06790	0.359865	-0.0690312	-2.17873	-0.902505	hypothetical protein
AFUA_6G00140	-1.94218	-2.32558	-2.65429	-2.24016	hypothetical protein
AFUA_6G03200	-2.12834	-0.537622	-0.450707	0.264659	solute symporter family transporter
AFUA_6G07480	-1.2192	-0.623877	0.976196	-1.91159	endoglucanase C
AFUA_6G08630	-1.71968	-0.756988	-0.883155	-0.431551	hypothetical protein
AFUA_6G08700	-2.47823	-0.595967	-1.70028	-1.14558	beta glucosidase, putative
AFUA_6G09670	0.2758	-3.37542	-4.86247	-6.06989	cytochrome P450 oxidoreductase GliC
AFUA_6G11330	-1.81771	-1.69759	-1.69474	-1.35322	histidine acid phosphatase, putative
AFUA_6G11390	-2.1491	-2.42541	-2.75144	-3.29084	1,3-beta-glucanosyltransferase Gel2
AFUA_6G11600	-2.14819	-0.498789	-0.902486	-0.0795689	endoglucanase, putative
AFUA_6G12240	-4.92533	-4.2567	-4.32925	-5.16109	Glycerophosphoryl diester phosphodiesterase family family
AFUA_6G13760	-2.6059	-2.24403	-2.65615	-2.55128	alpha-1,2-mannosidase, putative subfamily
AFUA_6G13840	-4.2201	-1.77514	-1.50705	-1.62583	conserved hypothetical protein
AFUA_6G14400	0.120157	-0.268663	-2.64454	0.996526	conserved hypothetical protein
AFUA_6G14540	-1.74413	2.01777	1.4898	2.02145	endo-1,3(4)-beta-glucanase, putative
AFUA_7G00450	-3.54245	-2.72596	-3.2295	-3.11109	GPI anchored protein, putative
AFUA_7G00580	-3.86695	-3.08841	-4.47445	-4.66377	conserved hypothetical protein
AFUA_7G00970	-1.32936	-1.31597	-1.73229	-2.64498	GPI-anchored serine-threonine rich protein
AFUA_8G00830	-0.808092	-1.61004	-3.20838	-2.88115	conserved hypothetical protein
AFUA_8G01080	-1.18404	-2.03297	-3.03186	-2.11149	hypothetical protein
AFUA_8G01410	-0.291324	-1.85986	-1.62298	-2.54684	class V chitinase ChiB1
AFUA_8G01480	-0.184254	-1.10586	-1.58703	-0.290652	potassium channel, putative
AFUA_8G01850	-5.52413	-2.45961	-3.39631	-3.54959	phosphate-repressible phosphate permease
AFUA_8G02450	-5.19469	-3.61931	-3.41687	-4.97116	hypothetical protein
AFUA_8G06830	0.159973	-2.00922	-1.67713	-1.71091	endoglucanase, putative
AFUA_8G06880	-2.98247	-2.70417	-3.39634	-2.98782	pectin methylesterase, putative
AFUA_8G07060	-0.948292	-0.553189	-1.98002	-1.7852	hydrophobin, putative

## Sheet: PrtT down-regulated only
ORF	4 HOURS	8 HOURS	12 HOURS	16 HOURS	ANNOTATION
AFUA_1G03350					alpha-1,3-glucanase/mutanase
AFUA_1G03360	-0.564119	0.701511	1.40093	0.185301	hypothetical protein
AFUA_1G07480	0.305011	-0.210261	-0.262911	-0.707772	coproporphyrinogen III oxidase, putative
AFUA_1G12350	0.748935	0.367373	3.2383	0.98805	extracellular fruiting body protein, putative
AFUA_1G17270	-0.0367823	-0.48237	-0.0101919	-0.0536575	ferric-chelate reductase (Fre2), putative
AFUA_2G02310	1.0544	0.0166893	-0.207383	-0.36855	sur7 protein, putative
AFUA_2G09350					endo-beta-1,6-glucanase, putative
AFUA_2G17330	-0.147205	-0.5934	-0.61656	-0.00426388	serine peptidase, family S28, putative
AFUA_3G00650					peptidase M28 family Lap1
AFUA_3G00820	0.822894	0.0257397	1.37792	0.482461	putative exported protein
AFUA_3G06460	-0.570083	-0.525842	-0.264762	0.0034771	conserved hypothetical protein
AFUA_3G08110	0.0270467	-0.127606	2.84062	-0.235373	cell wall protein, putative
AFUA_3G08990	1.70317	2.08446	0.164822	2.08649	hypothetical protein
AFUA_3G09690	-0.288056	-0.294722	-0.0154581	0.435035	extracellular thaumatin domain protein, putative
AFUA_4G06890	0.778089	-0.57198	0.640181	-0.673478	14-alpha sterol demethylase Cyp51A
AFUA_4G14240	0.774218	-0.343756	0.251063	-0.498843	O-methyltransferase
AFUA_5G13710	0.124265	0.0836163	1.55147	1.08175	carboxylesterase, putative
AFUA_6G00310	0.246688	2.74592	1.67128	3.93052	serine carboxypeptidase (CpdS), putative
AFUA_6G02800	0.153061	0.334478	-0.823378	-0.509973	GPI anchored protein, putative
AFUA_6G07200					conserved hypothetical protein
AFUA_6G10450	-0.472027	-0.391293	-0.771539	-1.24333	hypothetical protein
AFUA_7G03740	0.838408	0.0666704	0.213737	0.14765	14-alpha sterol demethylase Cyp51B
AFUA_7G05070	0.0362806	0.288555	-0.137994	-0.0314512	FAD dependent oxidoreductase, putative

## Sheet: Down-regulated IN COMMON
ORF	4 HOURS	8 HOURS	12 HOURS	16 HOURS	ANNOTATION
AFUA_1G03150	-0.10491	-1.13036	-0.653778	-1.90911	c-14 sterol reductase
AFUA_2G13460	0.560808	-0.0552111	1.07271	-2.01621	alpha-amylase, putative
AFUA_3G07310	-1.46679	-0.900798	-1.93034	-1.46114	conserved hypothetical protein
AFUA_3G14030	-4.86927	-3.69572	-4.87592	-3.8849	alkaline phosphatase
AFUA_4G09580	-3.23993	-2.13806	-0.449785	-2.20649	major allergen Asp F2
AFUA_4G11800	-1.60784	-3.81025	-4.36784	-1.19353	alkaline serine protease Alp1
AFUA_8G07080	-3.55719	-4.11672	-7.01509	-7.04917	elastinolytic metalloproteinase Mep
AFUA_8G07090	-3.15502	-0.86514	-0.662872	-0.305973	extracellular proline-serine rich protein
